# Supplementary material
Source: publisher figshare collection journal article supplement (https://osapublishing.figshare.com/ndownloader/files/22852988)
Supplement: Supplementary file 1 [file 22852988]

Archive with 22 entries (21 files):
- data/ICL_DCS_harmonic.mat
- pathfcns/cbrewer/
- pathfcns/cbrewer/._cbrewer.m
- pathfcns/cbrewer/._interpolate_cbrewer.m
- pathfcns/cbrewer/._plot_brewer_cmap.m
- pathfcns/cbrewer/cbrewer.m
- pathfcns/cbrewer/cbrewer_preview.jpg
- pathfcns/cbrewer/change_jet.m
- pathfcns/cbrewer/colorbrewer.mat
- pathfcns/cbrewer/interpolate_cbrewer.m
- pathfcns/cbrewer/plot_brewer_cmap.m
- pathfcns/LinkTopAxisData.m
- pathfcns/myfigure.m
- pathfcns/tightfig.m
- README.md
- README.pdf
- SubsamplingRealData/analyzeRef_subsamplingAveraging.m
- SubsamplingSyntheticData/combSimulator.m
- SubsamplingSyntheticData/combSimulator_F_S_likeDCS_demo.m
- SubsamplingSyntheticData/combSimulator_F_Sminus_demo.m
- SubsamplingSyntheticData/combSimulator_F_Splus_demo.m
- SubsamplingSyntheticData/subsamplingAnalysis.m
