# Supplementary material
Source: publisher figshare collection journal article supplement (https://osapublishing.figshare.com/ndownloader/files/22852988)
Supplement: Supplementary file 1 [file 22852988 › pathfcns/cbrewer/plot_brewer_cmap.m]

% Plots and identifies the various colorbrewer tables available.
% Is called by cbrewer.m when no arguments are given.
%
% Author: Charles Robert
% email: tannoudji@hotmail.com
% Date: 14.10.2011


load('colorbrewer.mat')

ctypes={'div', 'seq', 'qual'};
ctypes_title={'Diverging', 'Sequential', 'Qualitative'};
cnames{1,:}={'BrBG', 'PiYG', 'PRGn', 'PuOr', 'RdBu', 'RdGy', 'RdYlBu', 'RdYlGn', 'Spectral'};
cnames{2,:}={'Blues','BuGn','BuPu','GnBu','Greens','Greys','Oranges','OrRd','PuBu','PuBuGn','PuRd',...
             'Purples','RdPu', 'Reds', 'YlGn', 'YlGnBu', 'YlOrBr', 'YlOrRd'};
cnames{3,:}={'Accent', 'Dark2', 'Paired', 'Pastel1', 'Pastel2', 'Set1', 'Set2', 'Set3'};

figure('position', [314 327 807 420])
for itype=1:3
    
    %fh(itype)=figure();
    subplot(1,3,itype)
    
    for iname=1:length(cnames{itype,:})
        
        ncol=length(colorbrewer.(ctypes{itype}).(cnames{itype}{iname}));
        fg=1./ncol; % geometrical factor

        X=fg.*[0 0 1 1];
        Y=0.1.*[1 0 0 1]+(2*iname-1)*0.1;
        F=cbrewer(ctypes{itype}, cnames{itype}{iname}, ncol);

        for icol=1:ncol
            X2=X+fg.*(icol-1);
            fill(X2,Y,F(icol, :), 'linestyle', 'none')
            text(-0.1, mean(Y), cnames{itype}{iname}, 'HorizontalAlignment', 'right', 'FontWeight', 'bold', 'FontSize', 10, 'FontName' , 'AvantGarde')
            xlim([-0.4, 1])
            hold all
        end % icol
        %set(gca, 'box', 'off')
        title(ctypes_title{itype}, 'FontWeight', 'bold', 'FontSize', 16, 'FontName' , 'AvantGarde')
        axis off
        set(gcf, 'color', [1 1 1])
    end % iname
    ylim([0.1 1.05.*max(Y)]);
end %itype

set(gcf, 'MenuBar', 'none')
set(gcf, 'Name', 'ColorBrewer Color maps')
