# Supplementary material
Source: publisher figshare collection journal article supplement (https://osapublishing.figshare.com/ndownloader/files/22852988)
Supplement: Supplementary file 1 [file 22852988 › pathfcns/myfigure.m]

function [fHandle] = myfigure(width, height)
%myFigure Custom figure
%  myfigure(width, height) expects two parameters: width and height in
%  pixels

sSize = get(0,'ScreenSize');

x0=sSize(1,3)/2 - width/2;
y0=sSize(1,4)/2 - height/2;
figure('position', [x0,y0,width,height]);
set(gcf,'color','white')

end
