# Supplementary material
Source: publisher figshare collection journal article supplement (https://osapublishing.figshare.com/ndownloader/files/22852988)

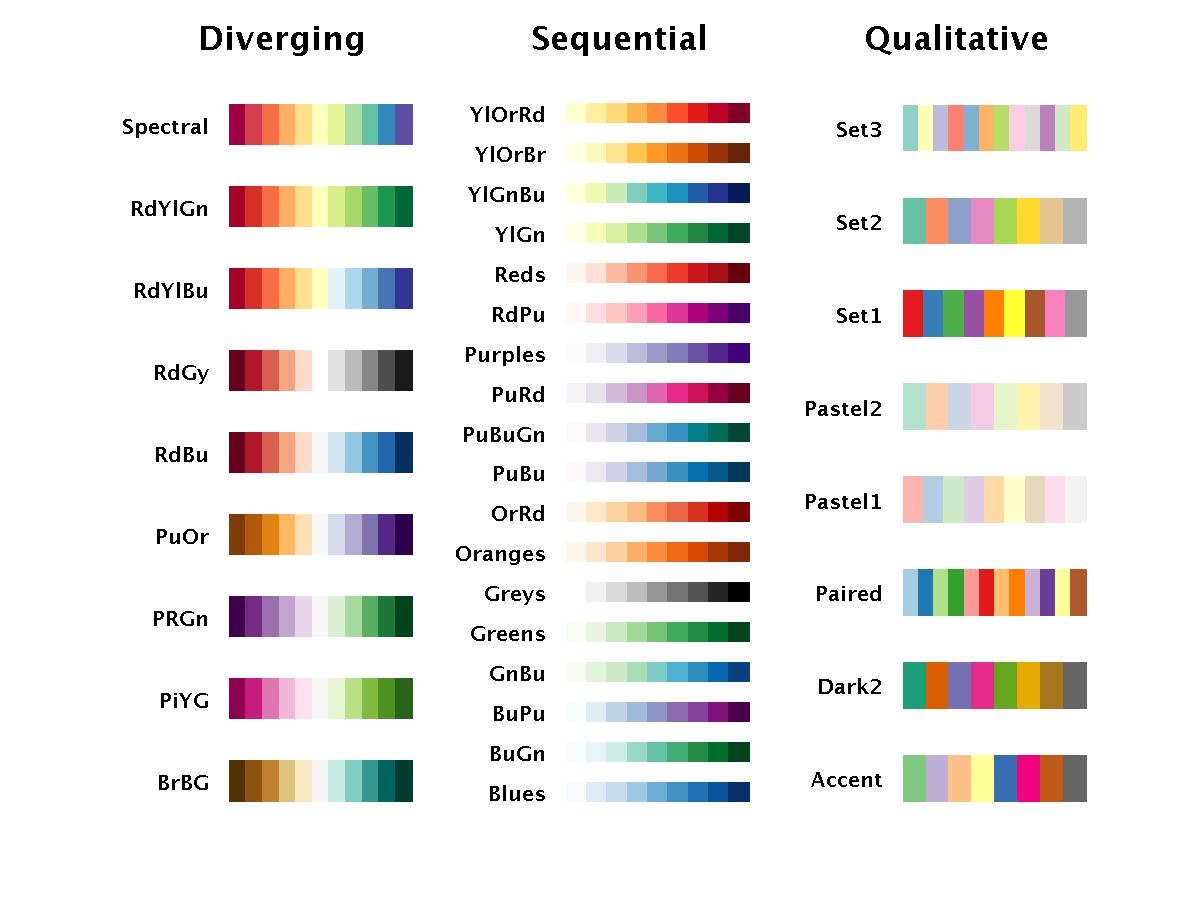

Supplement: Supplementary file 1 [file 22852988 › pathfcns/cbrewer/cbrewer_preview.jpg]
